# Supplementary material for: Blood Serum Calorimetry Indicates the Chemotherapeutic Efficacy in Lung Cancer Treatment
Source: PubMed Central journal article supplement (PMC5711924; doi:10.1038/s41598-017-17004-x), 2017-12-01
Supplement: 41598_2017_17004_MOESM1_ESM.pdf [file 41598_2017_17004_MOESM1_ESM.pdf]

## Supporting Information

# Blood serum calorimetry indicates the chemotherapeutic efficacy in lung cancer treatment

Karolina Kędra-Królik<sup>1,\*</sup>, Izabela Chmielewska<sup>2</sup>, Anna Michnik<sup>3,4</sup>, and Piotr Zarzycki<sup>5</sup>

<sup>1</sup>Institute of Physical Chemistry, Polish Academy of Sciences, Kasprzaka 44/52, 01-224 Warsaw, Poland

<sup>2</sup>Department of Pneumonology, Oncology and Allergology, Medical University of Lublin, Jaczewskiego 8 Lublin, 20-090 Poland

<sup>3</sup>Department of Medical Physics, A. Chełkowski Institute of Physics, Uniwersytecka 4, Katowice, 40-007, Poland

<sup>4</sup>Silesian Center for Education and Interdisciplinary Research, University of Silesia, 75th Pułku Piechoty 1A, Chorzów, 41-500 Poland

<sup>5</sup>Energy Geoscience Division, Lawrence Berkeley National Laboratory, 1 Cyclotron Road Berkeley, CA 94720, United States

\*kkedrakrol@ichf.edu.pl

**Table S1.** Parameters of DSC curves for eleven lung cancer patients samples (LC-a – adenocarcinoma, LC-s – squamous cell lung cancer; \* – progressing cancer) and healthy volunteers samples (H1-5).  $T_m$  – temperature at the peak maximum,  $Cp^{ex}$  – excess heat capacity at given  $T_m$ .

| Sample | $T_{m1}$<br>(°C) | $Cp^{ex}_1$<br>(cal g <sup>-1</sup> C <sup>-1</sup> ) | $T_{m2}$<br>(°C) | $Cp^{ex}_2$<br>(cal g <sup>-1</sup> C <sup>-1</sup> ) |
|--------|------------------|-------------------------------------------------------|------------------|-------------------------------------------------------|
| LC-a1  | 62.83            | 0.389                                                 | 68.85            | 0.250                                                 |
| LC-a2  | 62.21            | 0.408                                                 | 69.31            | 0.200                                                 |
| LC-a3* | 61.49            | 0.221                                                 | 70.09            | 0.303                                                 |
| LC-s4  | 61.51            | 0.456                                                 | 69.16            | 0.170                                                 |
| LC-s5  | 62.58            | 0.411                                                 | 68.82            | 0.221                                                 |
| LC-a6  | 63.40            | 0.367                                                 | 70.07            | 0.247                                                 |
| LC-a7* | 62.93            | 0.287                                                 | 70.39            | 0.277                                                 |
| LC-a8* | 62.79            | 0.133                                                 | 70.52            | 0.338                                                 |
| LC-a9  | 63.36            | 0.324                                                 | 70.02            | 0.259                                                 |

|        |       |       |       |       |
|--------|-------|-------|-------|-------|
| LC-a10 | 61.58 | 0.337 | 70.37 | 0.230 |
| LC-a11 | 61.42 | 0.405 | 70.75 | 0.263 |
| H1     | 62.99 | 0.343 | 69.12 | 0.269 |
| H2     | 63.23 | 0.345 | 68.56 | 0.308 |
| H3     | 63.78 | 0.304 | 68.31 | 0.246 |
| H4     | 62.42 | 0.345 | 69.08 | 0.277 |
| H5     | 62.59 | 0.367 | 69.25 | 0.248 |
